# Supplementary material for: Two mononuclear dysprosium(iii) complexes with their slow magnetic relaxation behaviors tuned by coordination geometry
Source: Royal Society of Chemistry journal article supplement (doi:10.1039/c9dt03253c), 2019-01-01
Supplement: c9dt03253c1.pdf [file c9dt03253c1.pdf]

## *Supporting Information*

### **Two mononuclear Dysprosium(III) complexes with their slow magnetic relaxation behaviors tuned by coordination geometry**

Shui Yu,<sup>a</sup> Zilu Chen,<sup>\*,a</sup> Huancheng Hu,<sup>a</sup> Bo Li,<sup>\*,b</sup> Yuning Liang,<sup>a</sup> Dongcheng Liu,<sup>a</sup>  
Huahong Zou,<sup>a</sup> Di Yao<sup>a</sup> and Fupei Liang<sup>\*,a,c</sup>

<sup>a</sup>*State Key Laboratory for Chemistry and Molecular Engineering of Medicinal Resources, School of Chemistry and Pharmaceutical Sciences, Guangxi Normal University, Guilin 541004, P. R. China. E-mail: zlchen@mailbox.gxnu.edu.cn; fliangoffice@yahoo.com*

<sup>b</sup>*College of Chemistry and Pharmaceutical Engineering, Nanyang Normal University, Nanyang 473061, P. R. China. E-mail: libozzu0107@163.com*

<sup>c</sup>*Guangxi Key Laboratory of Electrochemical and Magnetochemical Functional Materials, College of Chemistry and Bioengineering, Guilin University of Technology, Guilin, 541004, P. R. China. E-mail: fliangoffice@yahoo.com*

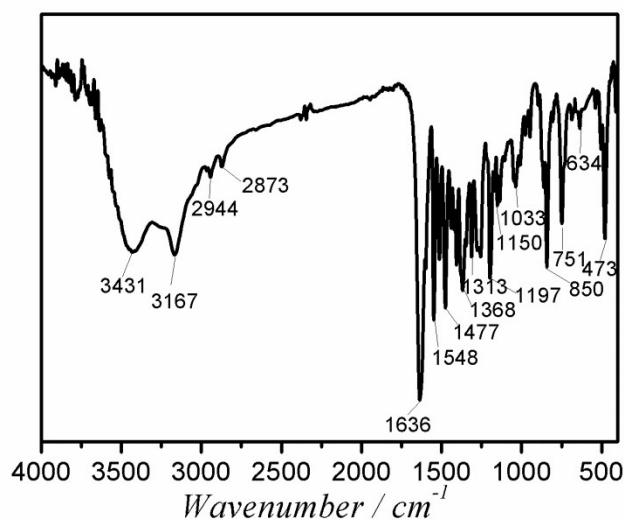

Fig. S1 FT-IR spectrum of 1.

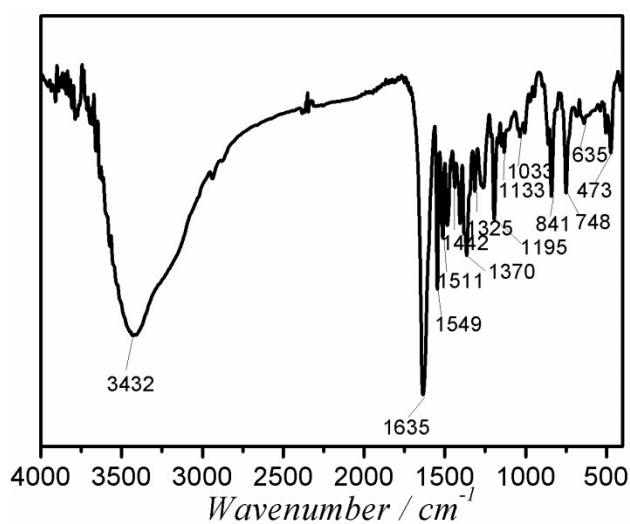

Fig. S2 FT-IR spectrum of 2.

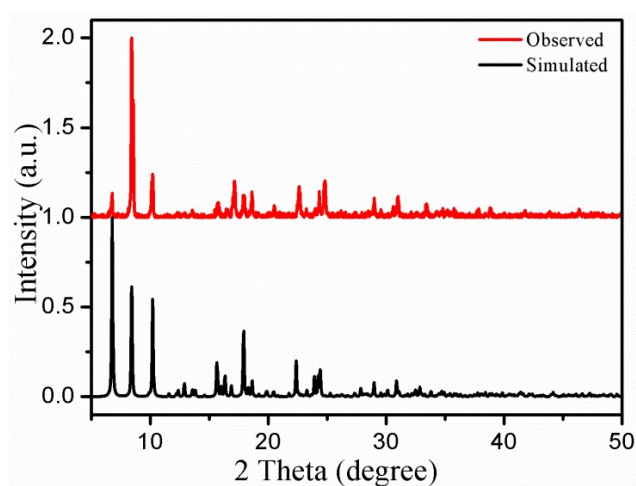

Fig. S3 PXRD patterns of 1.

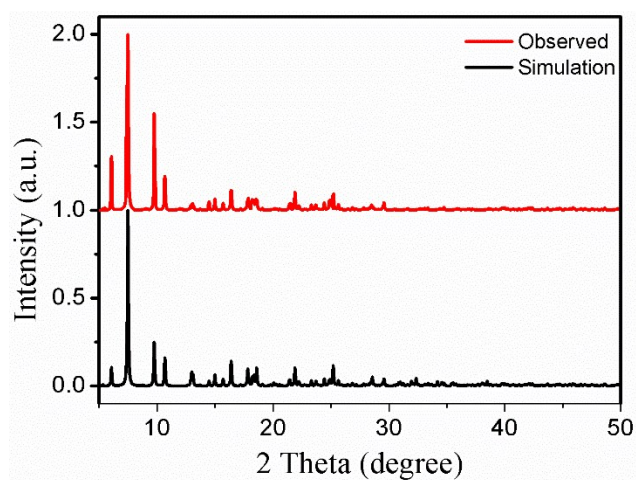

**Fig. S4** PXR D patterns of **2**.

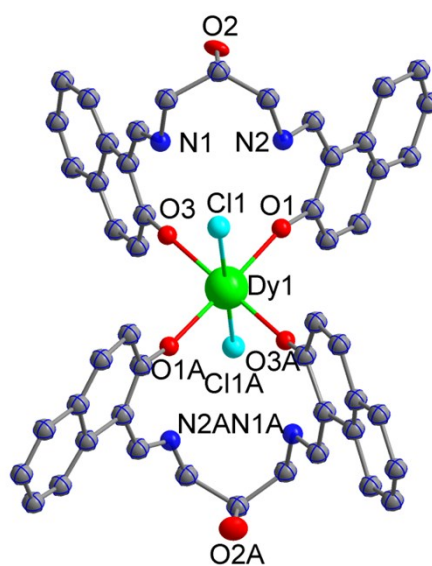

**Fig. S5** The structure of **1** with 30 % probability ellipsoid and selected atoms labelled. Hydrogen atoms are omitted for clarity. Symmetry code: A)  $-x + 1, -y + 1, -z + 1$ .

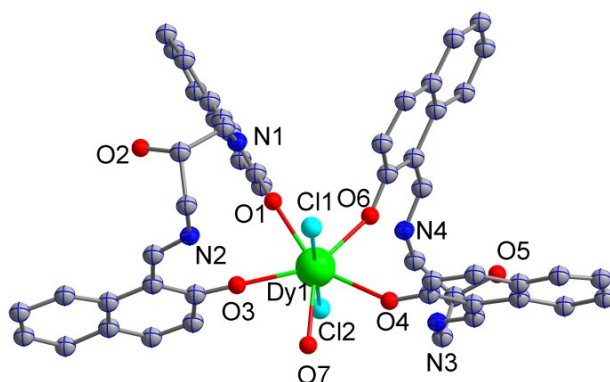

**Fig. S6** The structure of **2** with 30 % probability ellipsoid and selected atoms labelled. Hydrogen atoms are omitted for clarity.

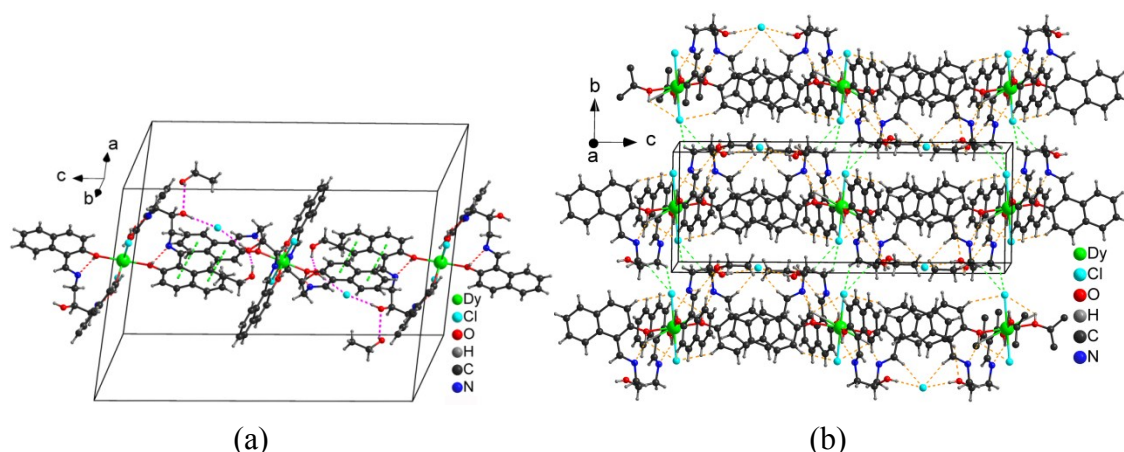

**Fig. S7** (a) 1D supramolecular chain of **1** formed through hydrogen bonds of O2-H2A $\cdots$ Cl2 and  $\pi\cdots\pi$  stacking interactions between the two naphthalene planes as revealed by a dihedral angle of 5.508(12) $^\circ$  and a ring-to-ring distance of 3.8071(13) Å. (b) 2D supramolecular framework of **1** formed from 1D supramolecular chains through non-classic hydrogen bonds of C-H $\cdots$ Cl (C12-H12B $\cdots$ Cl1(-x+1, -y, -z+1), C14-H14A $\cdots$ Cl1(-x+1, -y, -z+1)).

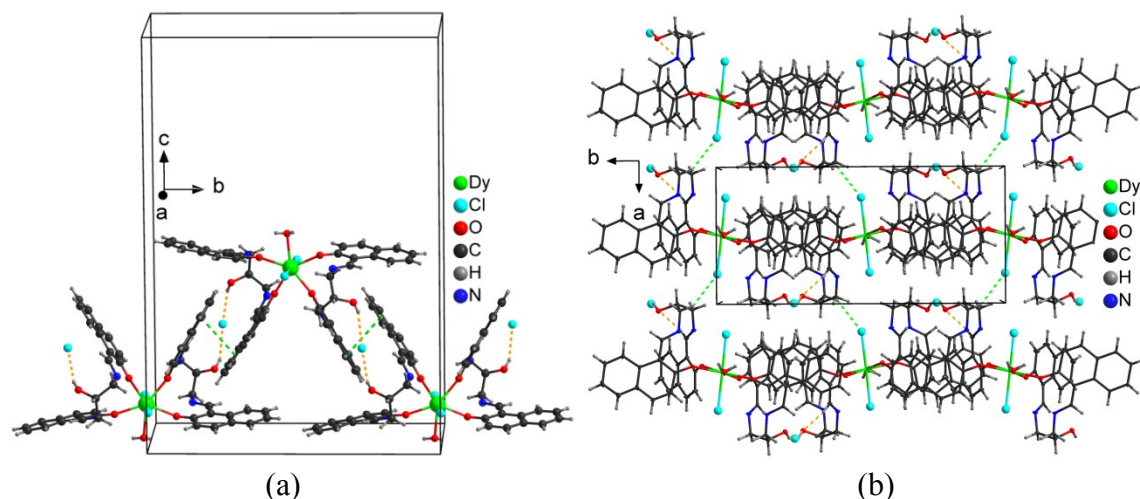

**Fig. S8** (a) 1D supramolecular chain of **2** formed by hydrogen bonds of O-H $\cdots$ Cl (O2-H2A $\cdots$ Cl3(-x+1,y+1/2,-z+1/2), O5-H5A $\cdots$ Cl3) and  $\pi\cdots\pi$  stacking interactions between the two naphthalene planes as revealed by a dihedral angle of 4.655(12) $^\circ$  and a ring-to-ring distance of 3.5743(1) Å. (b) 2D supramolecular framework of **2** formed from 1D supramolecular chains through non-classic hydrogen bonds of C-H $\cdots$ Cl (C12-H12A $\cdots$ Cl2(x-1,y,z)).

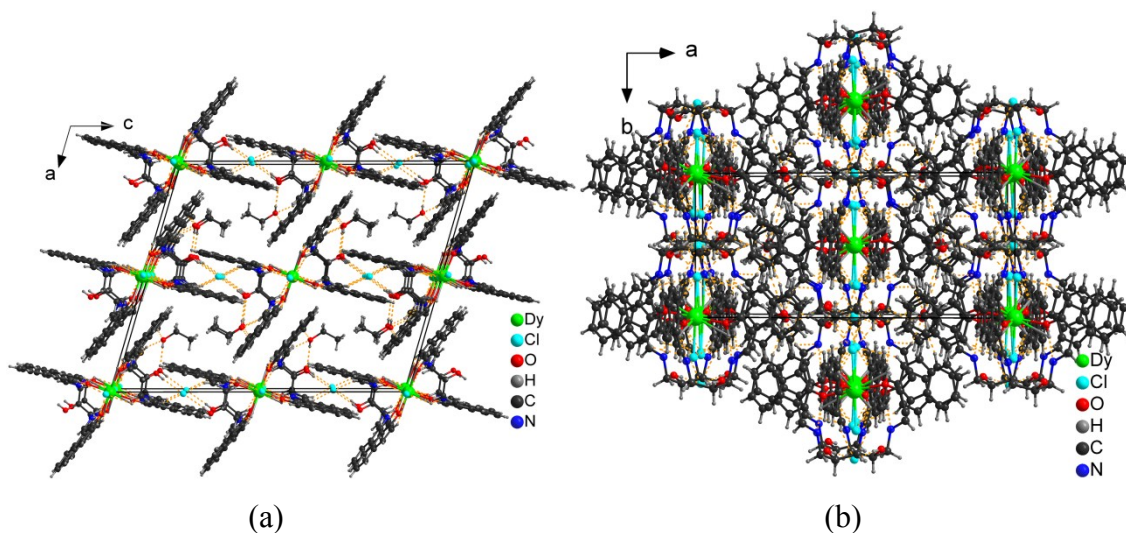

**Fig. S9** A stacking diagram of 1D supramolecular chain of **1** seen along the axis b (a) and along the axis c (b).

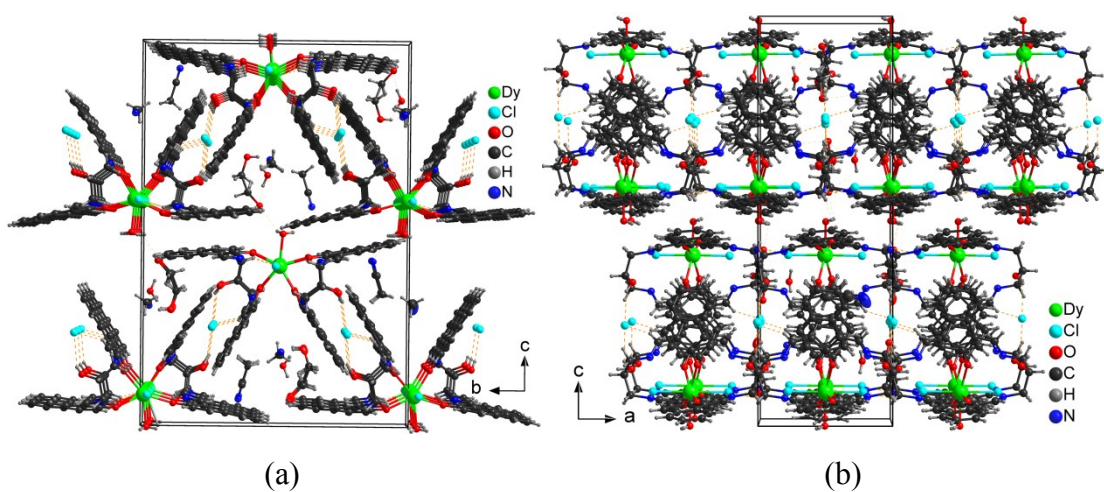

**Fig. S10** A stacking diagram of 1D supramolecular chain of **2** seen along the axis b (a) and along the axis c (b).

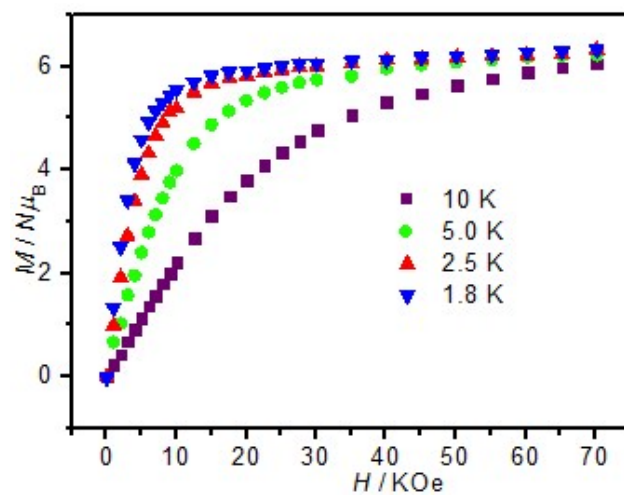

**Fig. S11** Plots of  $M$  vs.  $H$  for complex 1 measured at 1.8, 2.5, 5.0, and 10 K.

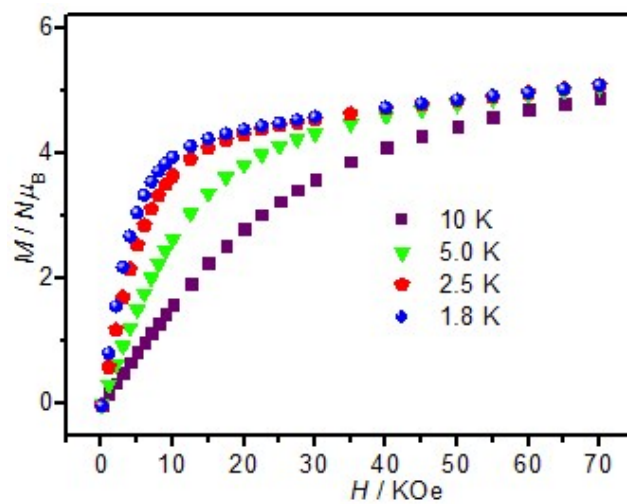

**Fig. S12** Plots of  $M$  vs.  $H$  for complex 2 measured at 1.8, 2, 5, 5.0, and 10 K.

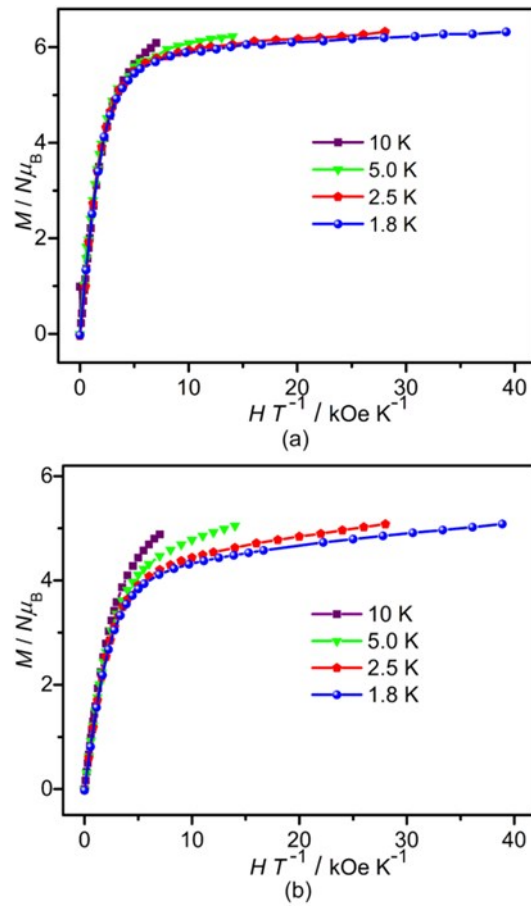

**Fig. 13** Plots of  $M$  vs  $HT^{-1}$  for **1** (a) and **2** (b) measured at 1.8, 2.5, 5.0, and 10 K.

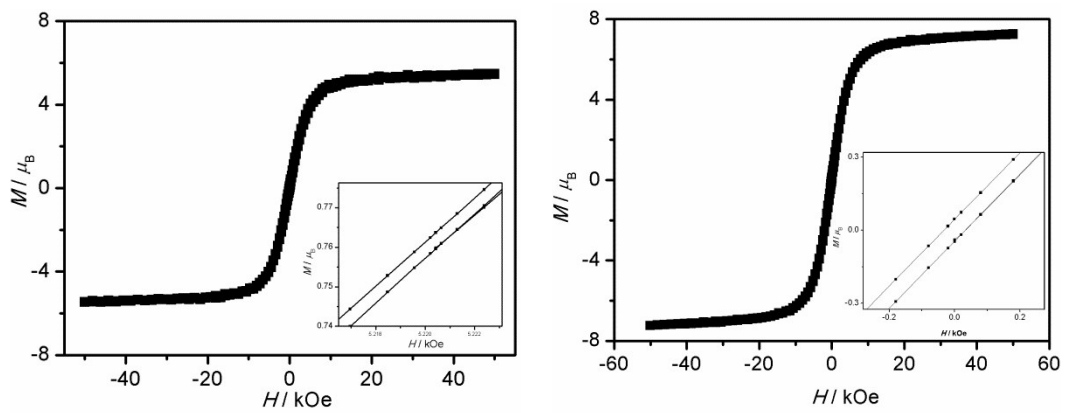

**Fig. S14** Plots of Magnetic hysteresis loops for **1** (left) and **2** (right).

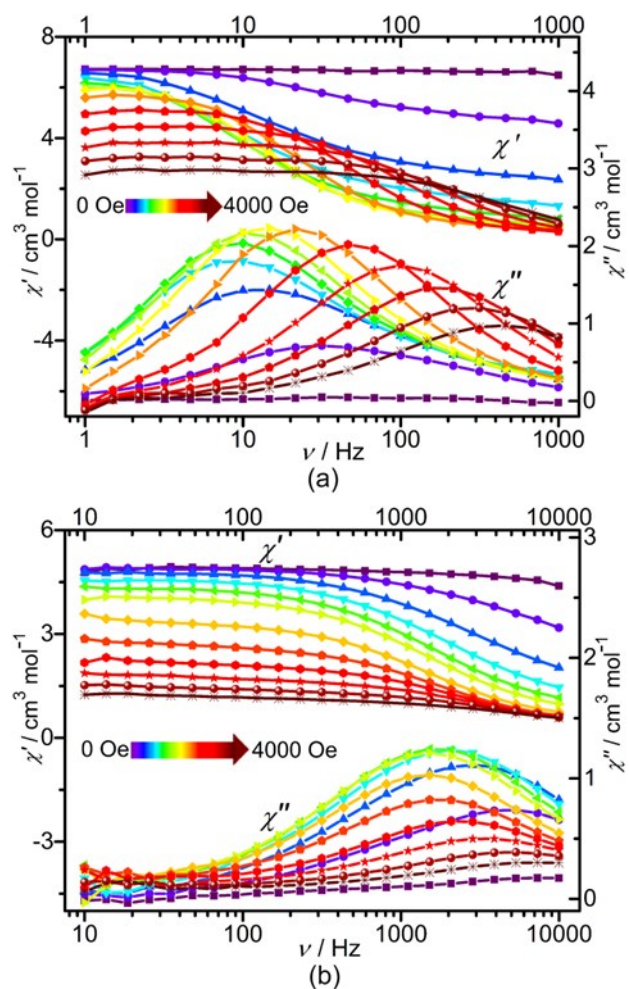

**Fig. S15** Frequency-dependent in-phase ( $\chi'$ ) and out-of phase ( $\chi''$ ) ac susceptibilities under different dc fields for **1** (a) at 2 K and **2** (b) at 1.8 K.

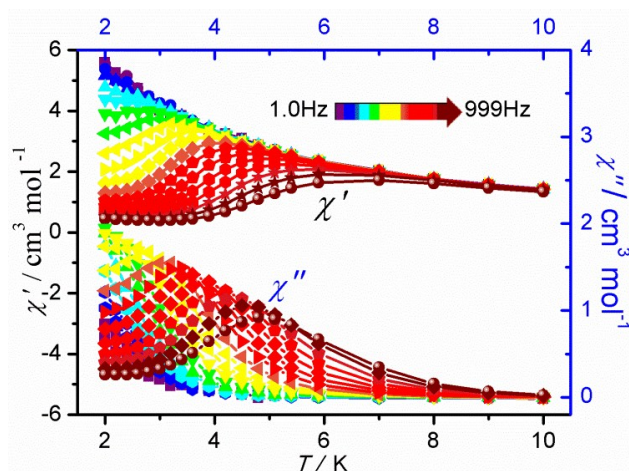

**Fig. S16** Plots of  $\chi'$  and  $\chi''$  vs  $T$  (1.8-10 K) at various frequencies under 1200 dc field for **1**.



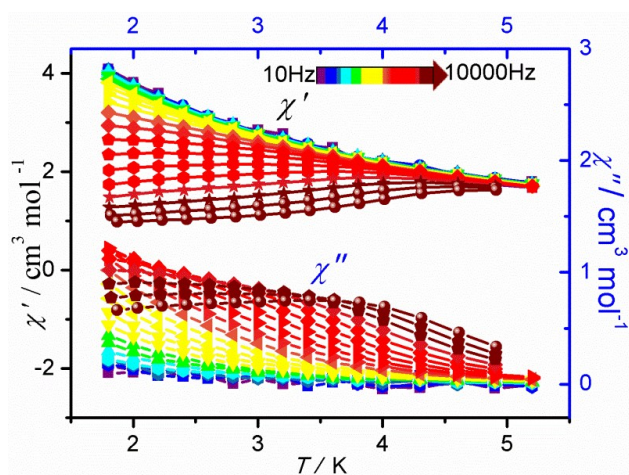

**Fig. S17**  $\chi'$  and  $\chi''$  vs  $T$  (1.8-5 K) plots at various frequencies under 1000 Oe for **2**.

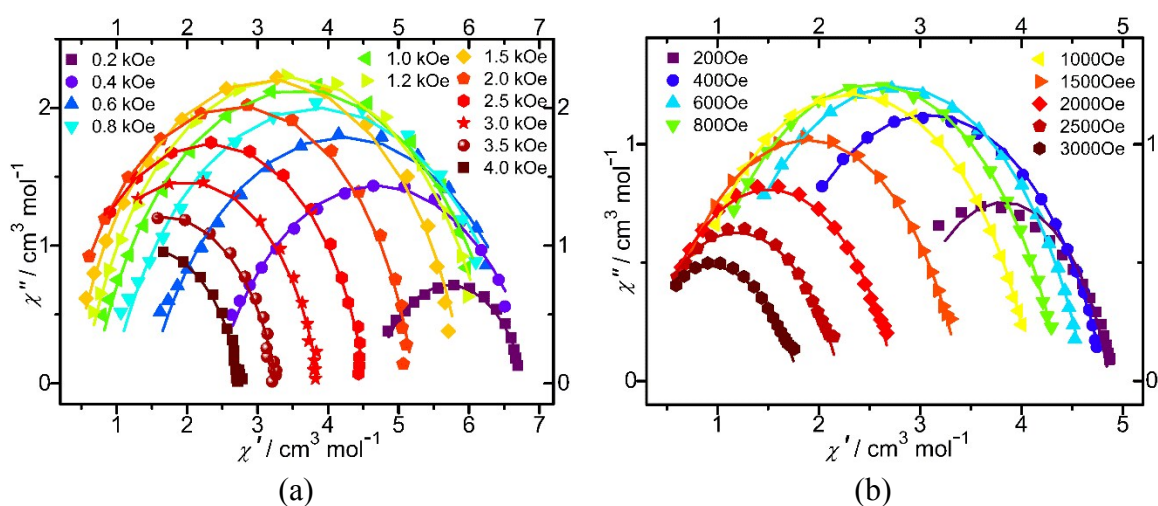

**Fig. S18** Cole–Cole drawings at different dc fields for **1** (a) and **2** (b) with the best fit to Debye model designated by solid lines.

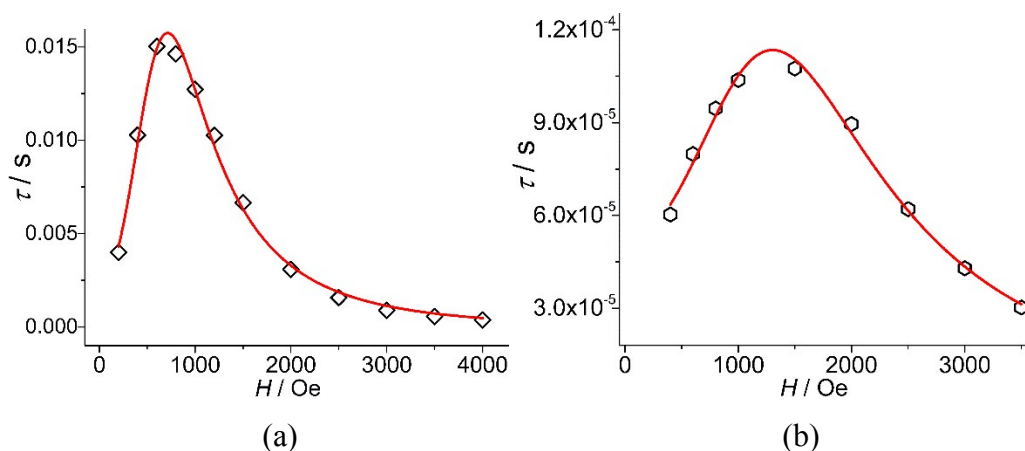

**Fig. S19**  $\tau$  versus  $H$  curves of **1** (a) and **2** (b) with the fit to the equation  $\tau^{-1} = B_1 / (1 + B_2H^2) + A_1H^4T + A_2H^2T$ .

**Table S1.** Selected bond lengths / Å and bond angles / ° for **1**.

|             |            |              |             |
|-------------|------------|--------------|-------------|
| Dy1-O1      | 2.224 (3)  | Dy1-O3A      | 2.237 (4)   |
| Dy1-O1A     | 2.224 (3)  | Dy1-Cl1A     | 2.6656 (17) |
| Dy1-O3      | 2.237 (4)  | Dy1-Cl1      | 2.6656 (17) |
| O1-Dy1-O1A  | 180.0      | O1A-Dy1-Cl1A | 84.81 (9)   |
| O1-Dy1-O3   | 84.50 (15) | O3-Dy1-Cl1A  | 95.49 (10)  |
| O1A-Dy1-O3  | 95.50 (15) | O3A-Dy1-Cl1A | 84.51 (10)  |
| O1-Dy1-O3A  | 95.50 (15) | O1-Dy1-Cl1   | 84.81 (9)   |
| O1A-Dy1-O3A | 84.50 (15) | O1A-Dy1-Cl1  | 95.19 (9)   |
| O3-Dy1-O3A  | 180.0      | O3-Dy1-Cl1   | 84.51 (10)  |
| O1-Dy1-Cl1A | 95.19 (9)  | O3A-Dy1-Cl1  | 95.49 (10)  |
|             |            | Cl1A-Dy1-Cl1 | 180.0       |

Symmetry code: A)  $-x+1, -y+1, -z+1$

**Table S2.** Selected bond lengths / Å and bond angles / ° for **2**.

|                  |           |                   |            |
|------------------|-----------|-------------------|------------|
| Dy(1)-O(4)       | 2.290(5)  | Dy(1)-O(7)        | 2.402(5)   |
| Dy(1)-O(1)       | 2.294(6)  | Dy(1)-Cl(1)       | 2.6628(19) |
| Dy(1)-O(3)       | 2.296(6)  | Dy(1)-Cl(2)       | 2.669(2)   |
| Dy(1)-O(6)       | 2.308(6)  |                   |            |
| O(4)-Dy(1)-O(1)  | 146.9(2)  | O(1)-Dy(1)-Cl(1)  | 84.64(15)  |
| O(4)-Dy(1)-O(3)  | 74.5(2)   | O(3)-Dy(1)-Cl(1)  | 81.68(15)  |
| O(1)-Dy(1)-O(3)  | 73.3(2)   | O(6)-Dy(1)-Cl(1)  | 96.06(16)  |
| O(4)-Dy(1)-O(6)  | 73.3(2)   | O(7)-Dy(1)-Cl(1)  | 89.3(2)    |
| O(1)-Dy(1)-O(6)  | 139.5(2)  | O(4)-Dy(1)-Cl(2)  | 81.55(16)  |
| O(3)-Dy(1)-O(6)  | 147.0(2)  | O(1)-Dy(1)-Cl(2)  | 95.20(15)  |
| O(4)-Dy(1)-O(7)  | 142.6(2)  | O(3)-Dy(1)-Cl(2)  | 97.45(15)  |
| O(1)-Dy(1)-O(7)  | 70.00(19) | O(6)-Dy(1)-Cl(2)  | 84.62(16)  |
| O(3)-Dy(1)-O(7)  | 142.9(2)  | O(7)-Dy(1)-Cl(2)  | 91.4(2)    |
| O(6)-Dy(1)-O(7)  | 69.5(2)   | Cl(1)-Dy(1)-Cl(2) | 179.13(6)  |
| O(4)-Dy(1)-Cl(1) | 98.11(16) |                   |            |

**Table S3.** Hydrogen bonds for **1** (Å and °)

| D-H...A                | d(D-H) | d(H...A) | d(D...A)  | <(DHA) |
|------------------------|--------|----------|-----------|--------|
| O(1)-H(1)...N(1)       | 0.85   | 2.02     | 2.659(5)  | 131.0  |
| C(2)-H(2)...Cl(1)#1    | 0.93   | 2.90     | 3.721(6)  | 147.6  |
| C(11)-H(11)...Cl(2)    | 0.93   | 2.82     | 3.697(5)  | 156.8  |
| C(12)-H(12B)...Cl(1)#2 | 0.97   | 2.97     | 3.759(5)  | 138.7  |
| O(2)-H(2A)...Cl(2)     | 0.82   | 2.29     | 3.113(4)  | 175.9  |
| C(14)-H(14A)...Cl(1)#2 | 0.97   | 2.96     | 3.750(6)  | 138.9  |
| C(15)-H(15)...O(4)#3   | 0.93   | 2.49     | 3.384(14) | 162.4  |
| C(24)-H(24)...Cl(1)#1  | 0.93   | 2.95     | 3.720(7)  | 140.7  |
| O(3)-H(3A)...Cl(1)     | 0.85   | 2.92     | 3.312(4)  | 110.5  |
| O(3)-H(3A)...N(2)      | 0.85   | 1.98     | 2.659(5)  | 136.5  |
| O(4)-H(4)...O(2)#4     | 0.82   | 2.44     | 2.893(16) | 115.6  |

Symmetry transformations used to generate equivalent atoms:

#1 -x+1,-y+1,-z+1    #2 -x+1,-y,-z+1    #3 x,-y,z+1/2    #4 x,-y,z-1/2    #5 x-1/2, -y + 1/2, z

**Table S4.** Hydrogen bonds for **2** (Å and °)

| D-H...A                | d(D-H) | d(H...A) | d(D...A)  | <(DHA) |
|------------------------|--------|----------|-----------|--------|
| C(2)-H(2)...Cl(2)      | 0.93   | 2.91     | 3.663(9)  | 139.1  |
| C(12)-H(12A)...Cl(2)#1 | 0.97   | 2.86     | 3.626(9)  | 137.1  |
| O(2)-H(2A)...Cl(3)#2   | 0.81   | 2.57     | 3.175(7)  | 132.9  |
| C(15)-H(15)...Cl(3)#2  | 0.93   | 2.81     | 3.642(9)  | 149.9  |
| C(24)-H(24)...Cl(2)    | 0.93   | 2.97     | 3.817(9)  | 151.4  |
| C(27)-H(27)...Cl(1)    | 0.93   | 2.96     | 3.807(10) | 151.6  |
| C(36)-H(36)...Cl(3)    | 0.93   | 2.92     | 3.780(9)  | 154.7  |
| C(37)-H(37B)...Cl(1)#3 | 0.97   | 2.97     | 3.754(9)  | 138.5  |
| O(5)-H(5A)...Cl(3)     | 0.81   | 2.44     | 3.154(7)  | 147.1  |
| C(39)-H(39A)...Cl(1)#3 | 0.97   | 2.88     | 3.685(8)  | 140.5  |
| C(49)-H(49)...Cl(1)    | 0.93   | 2.93     | 3.761(9)  | 149.6  |
| O(7)-H(71)...O(8)#4    | 0.73   | 2.38     | 2.763(14) | 114.9  |
| O(7)-H(72)...N(5)      | 0.85   | 2.47     | 2.984(9)  | 120.0  |
| C(52)-H(52B)...N(6)#5  | 0.96   | 2.57     | 3.52(3)   | 170.7  |
| C(52)-H(52C)...O(10)#4 | 0.96   | 2.55     | 3.21(6)   | 125.8  |
| O(8)-H(81)...O(7)#6    | 0.79   | 2.37     | 2.763(14) | 111.2  |
| C(53)-H(53A)...O(10)   | 0.96   | 2.26     | 3.01(6)   | 134.1  |
| O(9)-H(9)...N(6)#1     | 0.82   | 2.23     | 2.80(4)   | 127.4  |
| C(54)-H(54C)...O(10)   | 0.96   | 2.06     | 2.61(6)   | 114.7  |
| O(10)-H(101)...O(9)    | 0.84   | 2.37     | 2.80(6)   | 112.3  |
| O(10)-H(102)...O(8)    | 0.87   | 2.53     | 3.03(5)   | 117.0  |

Symmetry transformations used to generate equivalent atoms:

#1  $x-1, y, z$  #2  $-x+1, y+1/2, -z+1/2$  #3  $x+1, y, z$  #4  $-x+1/2, -y+2, z-1/2$  #5  $-x+3/2, -y+2, z-1/2$   
#6  $-x+1/2, -y+2, z+1/2$

**Table S5.** A list of some SIMs and their performances

| SIM                                                                                                                                                          | $U_{\text{eff}}$ [K] | $\tau_0$ [s]              | local symmetry | dc field [Oe] | Ref |
|--------------------------------------------------------------------------------------------------------------------------------------------------------------|----------------------|---------------------------|----------------|---------------|-----|
| [Dy <sup>III</sup> (L) <sub>2</sub> (NO <sub>3</sub> )](ClO <sub>4</sub> ) <sub>2</sub>                                                                      | 44.3                 | $5.17 \times 10^{-7}$     | $C_{2v}$       | 1000          | 1   |
| Dy(Hthd) <sub>3</sub> (MeOH)·2,5-Py                                                                                                                          | 26.6                 | $2.76 \times 10^{-6}$     | $C_{2v}$       | 1000          | 2   |
| [Dy(Hthd) <sub>3</sub> (Tppo)]                                                                                                                               | 35.9                 | $1.12 \times 10^{-6}$     | $C_{3v}$       | 1000          | 2   |
| [Dy(Hthd) <sub>3</sub> (PyNO)]                                                                                                                               | 42.7                 | $5.53 \times 10^{-6}$     | $C_{3v}$       | 1000          | 2   |
| [Dy(Hthd) <sub>3</sub> (4-PyNO)]                                                                                                                             | 55.8                 | $1.58 \times 10^{-6}$     | $C_{3v}$       | 1000          | 2   |
| [Dy(TFNB) <sub>3</sub> (bpy)]                                                                                                                                | 23.44                | $5.01 \times 10^{-6}$     | $D_{4d}$       | 1200          | 3   |
| [Dy(TTA) <sub>3</sub> Lz]                                                                                                                                    | 32                   | $5.55 \times 10^{-5}$     | $D_{4d}$       | 0             | 4   |
| [Dy(acac) <sub>3</sub> Lz]·CH <sub>3</sub> OH·0.5H <sub>2</sub> O                                                                                            | 162                  | $4.38 \times 10^{-6}$     | $D_{4d}$       | 0             | 4   |
| [Dy(MQ) <sub>2</sub> Lz <sub>2</sub> ]Br·CH <sub>3</sub> OH                                                                                                  | 80                   | $1.25 \times 10^{-6}$     | $D_{4d}$       | 0             | 4   |
| ( <sup>n</sup> Bu <sub>4</sub> N)[Ga <sup>III</sup> <sub>8</sub> Dy <sup>III</sup> (OH) <sub>4</sub> (shi) <sub>8</sub> ]                                    | 39                   | $2.3(5) \times 10^{-8}$   | $D_{4d}$       | 1000          | 5   |
| [Dy(Phen)(Cl-tcpb) <sub>3</sub> ]                                                                                                                            | 151.1                | $1.44 \times 10^{-8}$     | $D_{4d}$       | 0             | 6   |
| [Dy(Im <sup>Dipp</sup> N)Cl <sub>2</sub> (THF) <sub>3</sub> ]                                                                                                | 803                  | $1.4 \times 10^{-12}$     | $D_{4d}$       | 0             | 7   |
| [Ln(hfac) <sub>3</sub> (NIT-Pyz)] <sub>2</sub>                                                                                                               | 53                   | $1.85 \times 10^{-7}$     | $D_{4d}$       | 0             | 8   |
| Dy(btfa) <sub>3</sub> ·2H <sub>2</sub> O                                                                                                                     | 95.4                 | $2.8 \times 10^{-8}$      | $D_{4d}$       | 0             | 9   |
| {(H <sub>3</sub> O)[Dy(NA) <sub>2</sub> ]·H <sub>2</sub> O} <sub>n</sub>                                                                                     | 75                   | $4.21 \times 10^{-5}$     | $D_{5h}$       |               | 10  |
| [( <sup>t</sup> BuPO(NH <sup>i</sup> Pr) <sub>2</sub> ) <sub>2</sub> Dy(H <sub>2</sub> O) <sub>5</sub> ][I] <sub>3</sub> ·L <sub>2</sub> ·(H <sub>2</sub> O) | 651.0                | $5.63 \times 10^{-12}$    | $D_{5h}$       | 0             | 11  |
| [Dy(CyPh <sub>2</sub> PO) <sub>2</sub> (H <sub>2</sub> O) <sub>5</sub> ]Br <sub>3</sub> ·2(CyPh <sub>2</sub> PO)·EtOH·3H <sub>2</sub> O                      | 508                  | $8.6 \times 10^{-12}$     | $D_{5h}$       | 0             | 12  |
| [Dy(Bpen)(Cl) <sub>3</sub> ]                                                                                                                                 | 22.4                 | $3.72 \times 10^{-6}$     | $D_{5h}$       | 800           | 13  |
| [Dy(Bpen)Cl(OPhCl <sub>2</sub> NO <sub>2</sub> ) <sub>2</sub> ]                                                                                              | 85.8                 | $4.65 \times 10^{-7}$     | $D_{5h}$       | 100           | 13  |
| [Dy(Bpen)(OPhCl <sub>2</sub> NO <sub>2</sub> ) <sub>3</sub> ]                                                                                                | 34.2                 | $2.40 \times 10^{-6}$     | $D_{5h}$       | 800           | 13  |
| [Dy(Bpen)(OPhNO <sub>2</sub> ) <sub>3</sub> ]                                                                                                                | 26.8                 | $1.12 \times 10^{-6}$     | $D_{5h}$       | 800           | 13  |
| [(H <sub>2</sub> L)Dy <sup>III</sup> Cl <sub>2</sub> ]                                                                                                       | 70                   | $1.9 \times 10^{-6}$      | $D_{5h}$       | 500           | 14  |
| [Dy(bbpen)Br]                                                                                                                                                | 1025                 | $4.21 \times 10^{-12}$    | $D_{5h}$       | 2000          | 15  |
| [Dy(Cy <sub>3</sub> PO) <sub>2</sub> (H <sub>2</sub> O) <sub>5</sub> ]Br <sub>3</sub> ·2(Cy <sub>3</sub> PO)·2H <sub>2</sub> O·2EtOH                         | 543                  | $2.0 \times 10^{-10}$     | $D_{5h}$       | 0             | 16  |
| [Dy(Cy <sub>3</sub> PO) <sub>2</sub> (H <sub>2</sub> O) <sub>5</sub> ]Cl <sub>3</sub> ·(Cy <sub>3</sub> PO)·H <sub>2</sub> O·EtOH                            | 472                  | $8.7 \times 10^{-12}$     | $D_{5h}$       | 0             | 16  |
| [Dy(OtBu) <sub>2</sub> (py) <sub>5</sub> ][BPh <sub>4</sub> ]                                                                                                | 1815                 | $1.170 \times 10^{-12}$   | $D_{5h}$       | 0             | 17  |
| Dy(bpad) <sub>3</sub> ·CH <sub>3</sub> OH·H <sub>2</sub> O                                                                                                   | 106.93               | $2.28 \times 10^{-8}$     | $C_{4v}$       | 1200          | 18  |
| [DyH <sub>4</sub> L <sub>RRRRRR</sub> (SCN) <sub>2</sub> ](SCN) <sub>2</sub> ·xCH <sub>3</sub> OH·yH <sub>2</sub> O                                          | 34.5                 | $1.1 \times 10^{-6}$      | $C_{4v}$       | 200           | 19  |
| [Dy(bbpen)(tpeCOOH)]·2MeOH                                                                                                                                   | 77                   | $5.07 \times 10^{-6}$     | $D_{2d}$       | 0             | 20  |
| [Dy(dbpy)(tcpb) <sub>3</sub> ]·0.5(1,4-dioxane)                                                                                                              | 149.87               | $1.42 \times 10^{-15}$    | $D_{2d}$       | 0             | 21  |
| [(Cp <sup>iPr5</sup> )Dy(Cp*)] <sup>+</sup>                                                                                                                  | 2217                 | $4.2(6) \times 10^{-12}$  | metallocene    | 0             | 22  |
| [(Cp <sup>ttt</sup> ) <sub>2</sub> Dy][B(C <sub>6</sub> F <sub>5</sub> ) <sub>4</sub> ]                                                                      | 1837                 | $8.12 \times 10^{-12}$    | metallocene    | 0             | 23  |
| [Dy(bbpen)(tpe) <sub>2</sub> ][BPh <sub>4</sub> ]                                                                                                            | 944                  | $1.73(9) \times 10^{-12}$ | $D_{4d}$       | 0             | 24  |

**References:**

- [1] Q. Q. Su, K. Fan, X. X. Jin, X. Da Huang, S. C. Cheng, L. J. Luo, Y. J. Li, J. Xiang, C. C. Ko, L. M. Zheng, and T. C. Lau, *Inorg. Chem. Front.*, 2019, 6, 1442-1452.
- [2] X. Yao, P. Yan, G. An, Y. Li, W. Li, and G. Li, *Dalton Trans.*, 2018, 47, 3976-3984.

- [3] P. Cen, X. Ma, X. Liu, Y. Q. Zhang, G. Xie, and S. Chen, *J. Coord. Chem.*, 2018, **71**, 2209–2224.
- [4] M. Guo, J. Wu, O. Cador, J. Lu, B. Yin, B. Le Guennic, and J. Tang, *Inorg. Chem.*, 2018, **57**, 4534–4542.
- [5] A. A. Athanasopoulou, J. J. Baldoví, L. M. Carrella, and E. Rentschler, *Dalton Trans.*, 2019.
- [6] S. Zhang, W. Mo, J. Zhang, H. Wu, M. Li, X. Lü, B. Yin, and D. Yang, *RSC Adv.*, 2018, **8**, 29513–29525.
- [7] B.-C. Liu, N. Ge, Y.-Q. Zhai, T. Zhang, Y.-S. Ding, and Y.-Z. Zheng, *Chem. Commun.*, 2019, **55**, 9355–9358.
- [8] P. Y. Chen, M. Z. Wu, Z. Y. Liu, L. Tian, and Y. Q. Zhang, *Dalton Trans.*, 2019, **2**, 558–565.
- [9] X. L. Li, C. Zhu, Q. Rong, J. Wei, R. Li, and C. M. Liu, *New J. Chem.*, 2018, **42**, 10906–10911.
- [10] B. Na, X.-J. Zhang, W. Shi, Y.-Q. Zhang, B.-W. Wang, C. Gao, S. Gao, and P. Cheng, *Chem. Eur. J.*, 2014, **20**, 15975–15980.
- [11] S. K. Gupta, T. Rajeshkumar, G. Rajaraman, and R. Murugavel, *Chem. Sci.*, 2016, **7**, 5181–5191.
- [12] Y. C. Chen, J. L. Liu, Y. Lan, Z. Q. Zhong, A. Mansikkamäki, L. Ungur, Q. W. Li, J. H. Jia, L. F. Chibotaru, J. B. Han, W. Wernsdorfer, X. M. Chen, and M. L. Tong, *Chem. Eur. J.*, 2017, **23**, 5630.
- [13] M. Li, H. Wu, Q. Yang, H. Ke, B. Yin, Q. Shi, W. Wang, Q. Wei, G. Xie, and S. Chen, *Chem. Eur. J.*, 2017, **23**, 17775–17787.
- [14] A. K. Bar, P. Kalita, J. P. Sutter, and V. Chandrasekhar, *Inorg. Chem.*, 2018, **57**, 2398–2401.
- [15] J. Liu, Y. C. Chen, J. L. Liu, V. Vieru, L. Ungur, J. H. Jia, L. F. Chibotaru, Y. Lan, W. Wernsdorfer, S. Gao, X. M. Chen, and M. L. Tong, *J. Am. Chem. Soc.*, 2016, **138**, 5441–5450.
- [16] Y. C. Chen, J. L. Liu, L. Ungur, J. Liu, Q. W. Li, L. F. Wang, Z. P. Ni, L. F. Chibotaru, X. M. Chen, and M. L. Tong, *J. Am. Chem. Soc.*, 2016, **138**, 2829–2837.
- [17] Y. S. Ding, N. F. Chilton, R. E. P. Winpenny, and Y. Z. Zheng, *Angew. Chem. Int. Ed.*, 2016, **55**, 16071–16074.
- [18] X. G. Liu, X. F. Ma, W. Z. Yuan, Y. Q. Zhang, G. Xie, S. Chen, and E. Pardo, *Inorg. Chem.*, 2018, **57**, 14843–14851.
- [19] S. Lin, C. Wang, L. Zhao, and J. Tang, *Dalton Trans.*, 2015, **44**, 223–229.
- [20] S. K. Gupta, T. Rajeshkumar, G. Rajaraman, and R. Murugavel, *Chem. Sci.*, 2016, **7**, 5181–5191.
- [21] S. Zhang, W. Mo, B. Yin, G. Zhang, D. Yang, X. Lü, and S. Chen, *Dalton Trans.*, 2018, **47**, 12393–12405.
- [22] F.-S. Guo, B. M. Day, Y.-C. Chen, M.-L. Tong, A. Mansikkamäki and R. A. Layfield, *Science*, 2018, **362**, 1400–1403.
- [23] F.-S. Guo, B. M. Day, Y.-C. Chen, M.-L. Tong, A. Mansikkamäki and R. A. Layfield, *Angew. Chem. Int. Ed.*, 2017, **56**, 11445–11449.
- [24] F.-S. Guo, B. M. Day, Y.-C. Chen, M.-L. Tong, A. Mansikkamäki and R. A. Layfield, *Angew. Chem. Int. Ed.*, 2017, **56**, 11445–11449.
